# Supplementary material for: Development of American-Lineage Influenza H5N2 Reassortant Vaccine Viruses for Pandemic Preparedness
Source: MDPI journal article supplement (doi:10.3390/v11060543), 2019-06-11
Supplement: s1 [file s1]

**Figure S1. Growth curve of E7-V15 C11 virus.**

The growth curve was conducted in Vero cells with 0.0001 MOI.

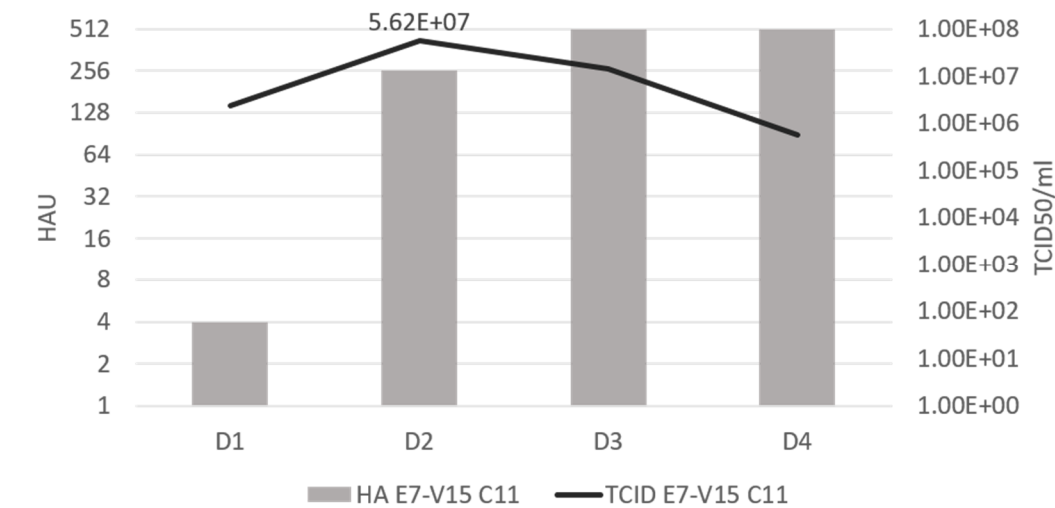

**Figure S2. Trypsin dependency test of the H5N2 reassortant virus, E7-V15 C11.**

Trypsin dependency test was conducted by plaque assay with trypsin-contained agarose or agarose without trypsin.

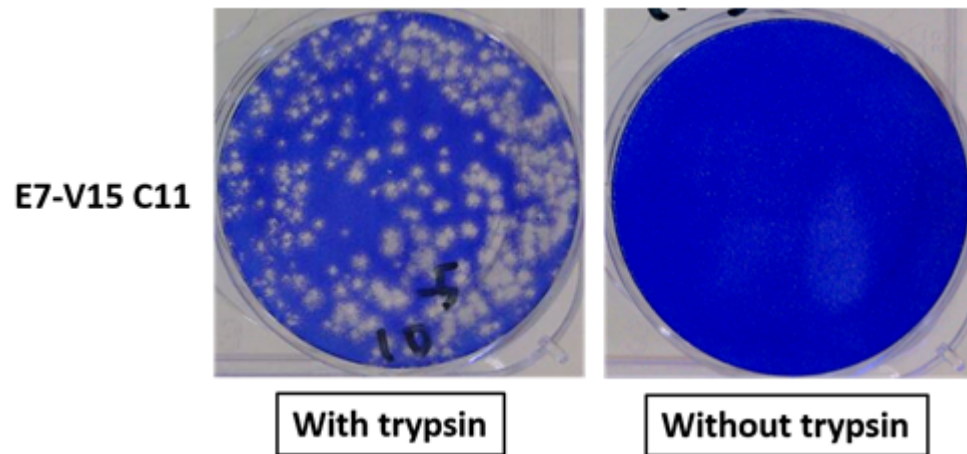

**Figure S3. The change of body weight and temperature in pathogenicity assay in ferrets.**

Four ferrets were intranasally inoculated with the vaccine virus, E7-V15 C11. The body weight and temperature were measured within the first 14 days after inoculation.

The solid and dashed lines represent body temperature and body weight changes, respectively.

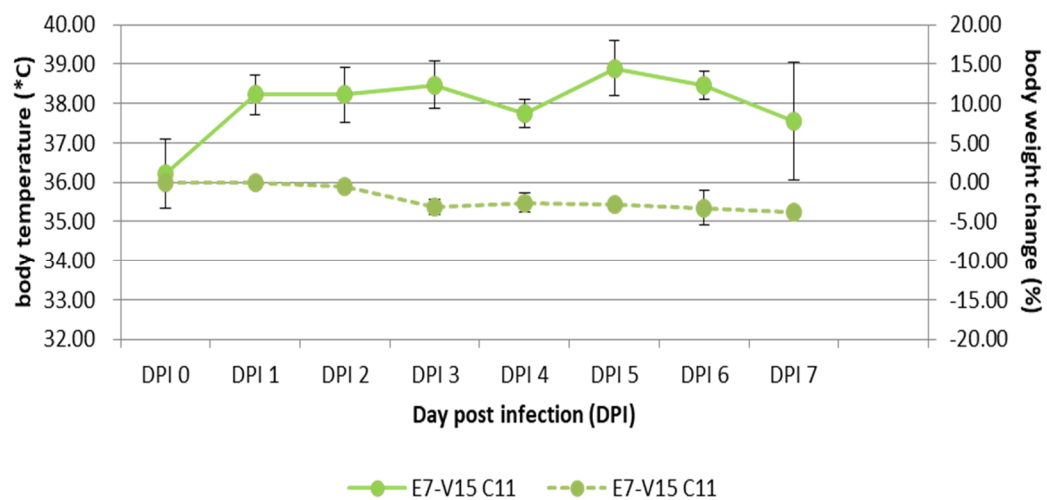

**Figure S4. The HA content of purified virus, E7-V15 C11, was analysed by using SDS-PAGE.**

Each lane contained 3  $\mu$ g of purified virus. Lane 1: non-reduced sample; Lane 2: reduced sample; Lane 3-5: sample treated with PNGase (deglycosylation); Lane 6-8: resolved freeze-dry sample and treated with PNGase; Lane 9: PNGase only. The bands of virus proteins were verified by LC-MS/MS.

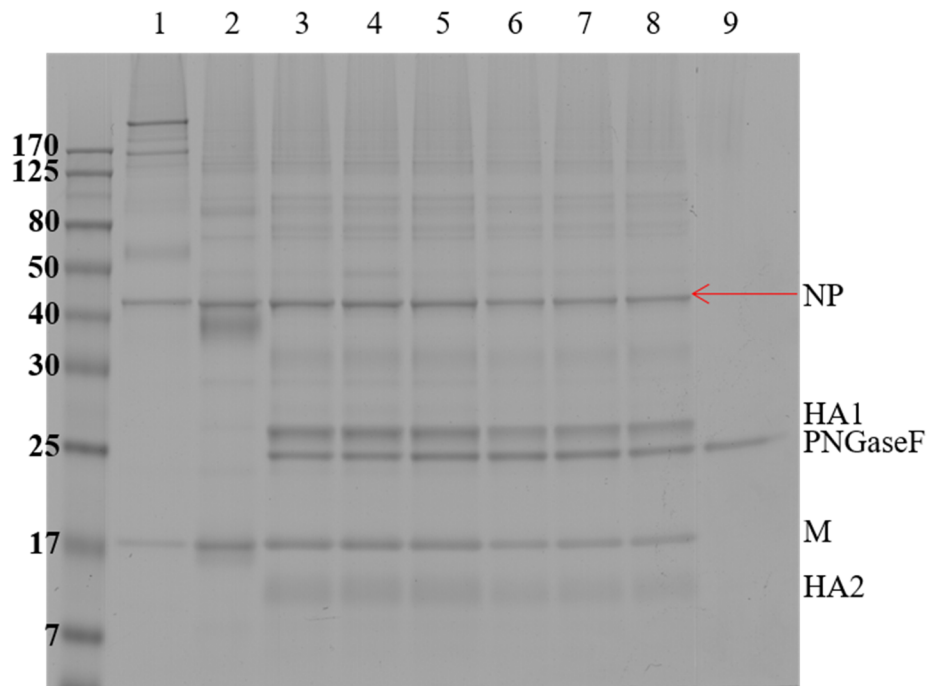

**Table S1. The cross-reactive HI antibody titres using Eurasian-lineage H5N1**

**mouse anti-sera.**

| virus                   | Mouse sera                              |                                                     |
|-------------------------|-----------------------------------------|-----------------------------------------------------|
|                         | rRG6 <sup>a</sup><br>(H5N1 clade 2.3.4) | Vero-adapted NIBRG14<br>(Vero-15)<br>(H5N1 clade 1) |
| A/CK/CY/A2628/2012 (E7) | <20                                     | <20                                                 |
| A/CK/YL/0502/2012 (R3)  | <20                                     | 20                                                  |
| RG6                     | 160                                     | <20                                                 |
| NIBRG14                 | <20                                     | 320                                                 |

a: The reassortant H5N1 vaccine virus, rRG6 (A/Anhui/1/05 x PR8), was generated using reverse genetics in our laboratory.

**Table S2. The sequence of the primers used in this study**

|                |                                                  |                                        |
|----------------|--------------------------------------------------|----------------------------------------|
| Bm-HA-F        | TATTCGTCTCAGGGAGCAAAAGCAGGGG                     | Hoffmann E et al.,<br>2001, Arch Virol |
| Bm-NS-R        | ATATCGTCTCGTATTAGTAGAAACAAGG<br>GTGTTTT          | Hoffmann E et al.,<br>2001, Arch Virol |
| Bm-NA-F        | TATTCGTCTCAGGGAGCAAAAGCAGGAG<br>T                | Hoffmann E et al.,<br>2001, Arch Virol |
| Bm-NA-R        | ATATCGTCTCGTATTAGTAGAAACAAGG<br>AGTTTTTT         | Hoffmann E et al.,<br>2001, Arch Virol |
| 08-forward     | CTGAGAAACATACCCAAGGAGAAACA<br>AGAGGCCTATTTGGAGC  | This study                             |
| 08-reverse     | GCTCCAAATAGGCCTCTTGTTTCTCCTTG<br>GGGTATGTTTCTCAG | This study                             |
| H5 (H5N2)-670F | CAGAGGTCAATCCCAGAAATAGC                          | This study                             |
| H5 (H5N2)-900R | CATTGTGGAAAGGCATACTGGAA                          | This study                             |
| N2 (H5N2)-600F | GATGCTCGTTGACAGTATAGGTTC                         | This study                             |
| N2 (H5N2)-800R | GTCTCTGCATACACATCTGACATT                         | This study                             |
| PB2-1F         | AGCGAAAGCAGGTCAATTATATT                          | This study                             |
| PB2-1R         | GGCACATCTCCAATAAAGATGC                           | This study                             |
| PB2-2F         | ACATAGTGAGAAGAGCTGCAGTATC                        | This study                             |
| PB2-2R         | CCAGTTTCTGATGATCCATTGA                           | This study                             |
| PB2-3F         | GATTAATGGTCCTGAATCAGTGTT                         | This study                             |
| PB2-3R         | AGTAGAAACAAGGTCGTTTTTAACT                        | This study                             |
| PB1-1F         | AGCGAAAGCAGGCAAACC                               | This study                             |
| PB1-1R         | GCCAACTTTGCTTTCTTCTCAT                           | This study                             |

|        |                              |            |
|--------|------------------------------|------------|
| PB1-2F | TTGAACAATCAGGGTTGCC          | This study |
| PB1-2R | ATGAACAACCTGAAGGGCCA         | This study |
| PB1-3F | AATATGATAAACAATGATCTTGGTCC   | This study |
| PB1-3R | AGTAGGAACAAGGCATTTTTTCA      | This study |
| PA-1F  | AGCGAAAGCAGGTACTGATCC        | This study |
| PA-1R  | GCTTGCCCTCAATGTAGCC          | This study |
| PA-2F  | TAGAGCCTATGTGGATGGATTC       | This study |
| PA-2R  | CCCTCCTTAGTTCTACACTTGCT      | This study |
| PA-3F  | TGCCTTACTTAATGCATCTTGTG      | This study |
| PA-3R  | AGTAGAAACAAGGTACTTTTTTGGAC   | This study |
| NP-1F  | AGCAAAAGCAGGGTAGATAATCA      | This study |
| NP-1R  | TGCAGACCGTGCTAGAAAAGT        | This study |
| NP-2F  | CAAGTGAGAGAGAGCCGGG          | This study |
| NP-2R  | AGTAGAAACAAGGGTATTTTTCTTTAAT | This study |
| NS-1F  | AGCAAAAGCAGGGTGACAA          | This study |
| NS-1R  | AGTAGAAACAAGGGTGTTTTTTATTAT  | This study |
| M1-1F  | AGCGAAAGCAGGTAGATATTGA       | This study |
| M1-2R  | AGTAGAAACAAGGTAGTTTTTTACTCC  | This study |

**Table S3. The antigenicity of reassortant viruses analyzed using HI assay.**

|                         | Ferret sera       |                   |                         | Chicken sera <sup>a</sup> | Goat serum <sup>b</sup> |
|-------------------------|-------------------|-------------------|-------------------------|---------------------------|-------------------------|
| virus                   | R3                | CH/2003           | E7-V15 C11 <sup>c</sup> | E7-V15 C11                | E7 bHA                  |
| A/CK/CY/A2628/2012 (E7) | 160, 320<br>(226) | 320, 320<br>(320) | 80, 160<br>(113)        | 80, 160<br>(113)          | 320                     |
| A/CK/YL/0502/2012 (R3)  | 80, 160<br>(113)  | 160, 160<br>(160) | 40, 160 (80)            | 40, 80 (56)               | 160                     |
| E7-V15 C11              | 80, 80 (80)       | 160, 160<br>(160) | 160, 320<br>(226)       | 80, 160<br>(113)          | 320                     |

a: The background information of chicken anti-(E7-V15 C11) sera were described in Table S4 (serum no. 3 and 8).

b: Goat anti-E7 bHA serum was standard serum generated in this study (result 3.6)

c: The background information of ferret anti-(E7-V15 C11) sera were described in Table 3 (ferret serum no. 265 and 266).



**Table S4. The HI titer of E7-V15 C11 virus-infected chickens.**

Nine chickens were used for pathogenicity test. After 10 days monitor, the chickens were sacrificed and the sera were taken for HI assay.

| No.      | 1  | 2 | 3   | 4  | 5  | 6  | 7  | 8   | 9  |
|----------|----|---|-----|----|----|----|----|-----|----|
| HI titer | 32 | 8 | 128 | 64 | 16 | 16 | 16 | 128 | 32 |

**Table S5. Virus titers (log (TCID50)) of organs from infected ferrets were tested with Vero cells.**

Each group having four ferrets were infected with the vaccine virus, E7-V15 C11.

Two ferrets in the group were sacrificed on the third day after infection and the rest two on the 14th day. NT: nasal turbinate; UpRT: upper respiratory tract (top 1/3 of the trachea); LoRT: lower respiratory tract (bottom 1/3 of the trachea); HLN: Hilar lymph node; M: male; F: female.

| Vaccine virus (E7-V15 C11) |         |         |         |         |
|----------------------------|---------|---------|---------|---------|
| No. of ferret              | 239 (M) | 240 (F) | 238 (M) | 241 (F) |
| Sacrifice at               | Day 3   |         | Day 14  |         |
| NT                         | <1      | <1      | <1      | <1      |
| UpRT                       | <1      | <1      | <1      | <1      |
| LoRT                       | <1      | <1      | <1      | <1      |
| HLN                        | <1      | <1      | <1      | <1      |
| Lung                       | <1      | <1      | <1      | <1      |
| Brain                      | <1      | <1      | <1      | <1      |
| Homologous HI titer        | -       | -       | 20      | 20      |

**Table S6. The HA content and HA:NP ratio of the E7-V15 C11 purified whole virus antigens.**

|                                                        | <b>E7-V15 C11</b> |
|--------------------------------------------------------|-------------------|
| <b>TOTAL PROTEIN (MG/ML) BASED ON LOWRY ASSAY</b>      | 177.77            |
| <b>HEMAGGLUTININ RATIO (%) BASED ON SDS-PAGE</b>       | 36.4              |
| <b>HEMAGGLUTININ CONTENT (MG/ML) BASED ON SDS-PAGE</b> | 64.8              |
| <b>HA/NP RATIO BASED ON SDS-PAGE</b>                   | 1.45              |
